# Supplementary material for: Evaluation of Sucrose Laurate as an Intestinal Permeation Enhancer for Macromolecules: Ex Vivo and In Vivo Studies
Source: PubMed Central journal article supplement (PMC6921008; doi:10.3390/pharmaceutics11110565), 2019-10-31
Supplement: pharmaceutics-11-00565-s001.pdf [file pharmaceutics-11-00565-s001.pdf]

# Evaluation of Sucrose Laurate as an Intestinal Permeation Enhancer for Macromolecules: Ex Vivo and In Vivo Studies: Supplementary Information

Fiona McCartney, Mónica Rosa and David J. Brayden

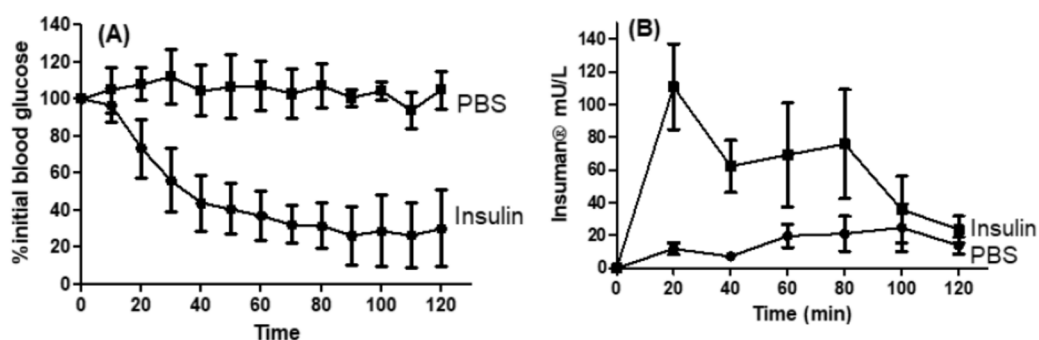

**Figure S1.** (A) Reduction in blood glucose after s.c. injection of insulin (1 IU/kg) or PBS. A statistically significant reduction in blood glucose was observed from 20 min onward using two-way ANOVA with Bonferroni's *post-test*;  $***p < 0.001$  versus PBS, (B) Serum insulin following s.c. injection;  $p < 0.01$  versus PBS from 20 min. Mean  $\pm$  SEM and  $n = 6$  per group in each panel.

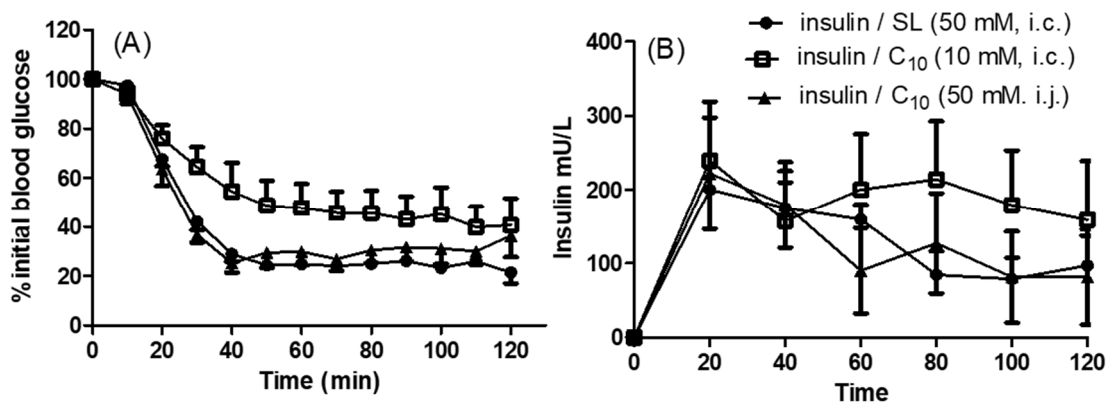

**Figure S2.** (A) Blood glucose, (B) Serum insulin levels after intra-colonic (i.c.) instillation of insulin/SL and insulin/C<sub>10</sub>, and intra-jejunal (i.j.) instillation of insulin/C<sub>10</sub>. The insulin dose was 50 IU/kg. Symbols in (B) also apply to (A). These three concentrations of SL and C<sub>10</sub> were tested along with those in Figure 7 and are shown separately here order to make Figure 7 clearer. They are included in Table 1 and in the associated statistical analyses.

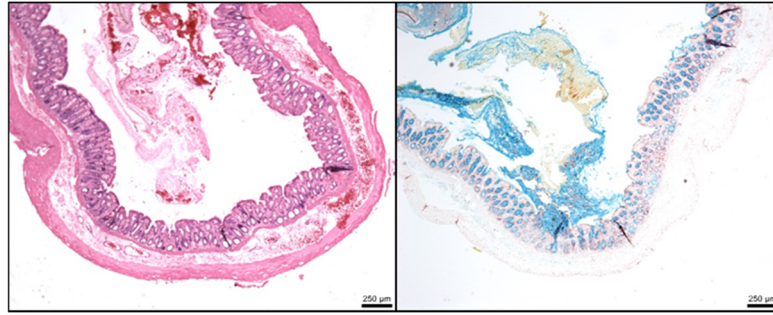

**Figure S3.** Representative histology obtained after i.c. instillation of insulin/C<sub>10</sub> (10 mM) after 120 min. H & E (left panel) and Alcian blue (right panel). Bar = 250 μm.

**Table S1.** Statistical analysis of % Initial TEER following apical addition of SL to rat colonic mucosae with respect to data in Figure 5A. Values were using two-way ANOVA with Bonferroni's *post-test*. \*\**p* < 0.01 and \*\*\**p* < 0.001 compared to KH buffer; ns: not significant.

| Time (min) | 1.5 mM SL | 5 mM SL | 10 mM SL | 10 mM C <sub>10</sub> |
|------------|-----------|---------|----------|-----------------------|
| 0          | ns        | ns      | ns       | ns                    |
| 5          | ***       | ***     | ***      | **                    |
| 10         | ***       | ***     | ***      | ***                   |
| 15         | ***       | ***     | ***      | ***                   |
| 20         | ***       | ***     | ***      | ***                   |
| 40         | ***       | ***     | ***      | ***                   |
| 60         | ***       | ***     | ***      | ***                   |
| 80         | ***       | ***     | ***      | ***                   |
| 100        | ***       | ***     | ***      | ***                   |
| 120        | ***       | ***     | ***      | ***                   |

**Table S2.** Statistical analysis of the reduction in blood glucose after i. j. instillation of insulin with SL using two-way ANOVA with Bonferroni's *post-test*. Data refers to Figure 7A. Insulin/C<sub>10</sub> was the positive control. \**p* < 0.05, \*\**p* < 0.01 and \*\*\**p* < 0.001 compared to insulin solution control (50 IU/kg); ns: not significant.

| Time (min) | PBS | Insulin/SL (50 mM) | Insulin/SL (100 mM) | Insulin/C <sub>10</sub> (50 mM) | Insulin/C <sub>10</sub> (100 mM) |
|------------|-----|--------------------|---------------------|---------------------------------|----------------------------------|
| 0          | ns  | ns                 | ns                  | ns                              | ns                               |
| 10         | ns  | ns                 | ns                  | ns                              | ns                               |
| 20         | ns  | ns                 | *                   | ns                              | *                                |
| 30         | ns  | *                  | **                  | ***                             | ***                              |
| 40         | ns  | **                 | ***                 | ***                             | ***                              |
| 50         | ns  | **                 | ***                 | ***                             | ***                              |
| 60         | ns  | **                 | ***                 | ***                             | ***                              |
| 70         | ns  | **                 | ***                 | ***                             | ***                              |
| 80         | ns  | ns                 | **                  | ***                             | ***                              |
| 90         | ns  | *                  | **                  | ***                             | ***                              |
| 100        | ns  | ns                 | **                  | ***                             | ***                              |
| 110        | ns  | ns                 | *                   | ***                             | ***                              |
| 120        | ns  | ns                 | ***                 | ***                             | ***                              |

**Table S3.** Statistical analysis of serum insulin (mU/L) after i. j. instillation of SL with insulin using two-way ANOVA with Bonferroni's *post-test*. Data refers to Figure 7B. Insulin/C<sub>10</sub> was used as a positive control. \**p* < 0.05, \*\**p* < 0.01 and \*\*\**p* < 0.001 compared to insulin solution controls (50 IU/kg); ns: not significant.

| Time (min) | PBS | Insulin/SL<br>(50 mM) | Insulin/SL<br>(100 mM) | Insulin/C <sub>10</sub><br>(50 mM) | Insulin/C <sub>10</sub><br>(100 mM) |
|------------|-----|-----------------------|------------------------|------------------------------------|-------------------------------------|
| 0          | ns  | ns                    | ns                     | ns                                 | ns                                  |
| 20         | ns  | ***                   | ***                    | ***                                | ns                                  |
| 40         | ns  | ns                    | ***                    | *                                  | *                                   |
| 60         | ns  | ns                    | *                      | ns                                 | ns                                  |
| 80         | ns  | ns                    | ns                     | ns                                 | ns                                  |
| 100        | ns  | ns                    | ns                     | ns                                 | ns                                  |
| 120        | ns  | ns                    | ns                     | ns                                 | ns                                  |

**Table S4.** Statistical analysis of blood glucose after i.c. instillation of SL with insulin using two-way ANOVA with Bonferroni's *post-test*. Data refers to Figure 7C. C<sub>10</sub> was used as a positive control. \**p* < 0.05, \*\**p* < 0.01 and \*\*\**p* < 0.001 compared to insulin solution control (50 IU/kg); ns: not significant.

| Time (min) | PBS | Insulin/SL<br>(1 mM) | Insulin/SL<br>(10 mM) | Insulin/SL<br>(25 mM) | Insulin/SL<br>(50 mM) | Insulin/C <sub>10</sub><br>(10 mM) | Insulin/C <sub>10</sub><br>(25 mM) |
|------------|-----|----------------------|-----------------------|-----------------------|-----------------------|------------------------------------|------------------------------------|
| 0          | ns  | ns                   | ns                    | ns                    | Ns                    | ns                                 | ns                                 |
| 10         | ns  | ns                   | ns                    | ns                    | ns                    | ns                                 | ns                                 |
| 20         | ns  | ns                   | *                     | **                    | ns                    | **                                 | **                                 |
| 30         | ns  | **                   | ***                   | ***                   | ***                   | ***                                | ***                                |
| 40         | ns  | ***                  | ***                   | ***                   | ***                   | ***                                | ***                                |
| 50         | ns  | ***                  | ***                   | ***                   | ***                   | ***                                | ***                                |
| 60         | ns  | ***                  | ***                   | ***                   | ***                   | ***                                | ***                                |
| 70         | ns  | ***                  | ***                   | ***                   | ***                   | ***                                | ***                                |
| 80         | *   | **                   | ***                   | ***                   | ***                   | ***                                | ***                                |
| 90         | *   | **                   | ***                   | ***                   | ***                   | ***                                | ***                                |
| 100        | *   | ***                  | ***                   | ***                   | ***                   | ***                                | ***                                |
| 110        | ns  | ***                  | ***                   | ***                   | ***                   | ***                                | ***                                |
| 120        | **  | ***                  | ***                   | ***                   | ***                   | ***                                | ***                                |

**Table S5.** Statistical analysis of serum insulin (mU/L) after i.c. instillation of SL with insulin using two-way ANOVA with Bonferroni's *post-test*. Data refers to Figure 7D. Insulin/C<sub>10</sub> was used as a positive control. \**p* < 0.05, \*\**p* < 0.01 and \*\*\**p* < 0.001 compared to insulin control (50 IU/kg); ns: not significant.

| Time (min) | PBS | Insulin/SL<br>(1 mM) | Insulin/SL<br>(10 mM) | Insulin/SL<br>(25 mM) | Insulin/SL<br>(50 mM) | Insulin/C <sub>10</sub><br>(10 mM) | Insulin/C <sub>10</sub><br>(25 mM) |
|------------|-----|----------------------|-----------------------|-----------------------|-----------------------|------------------------------------|------------------------------------|
| 0          | ns  | ns                   | ns                    | ns                    | ns                    | ns                                 | ns                                 |
| 20         | ns  | ns                   | ns                    | ***                   | **                    | **                                 | ns                                 |
| 40         | ns  | ns                   | ns                    | ***                   | *                     | ns                                 | *                                  |
| 60         | ns  | ns                   | ns                    | ***                   | *                     | ns                                 | ns                                 |
| 80         | ns  | ns                   | ns                    | ***                   | ns                    | *                                  | ns                                 |
| 100        | ns  | ns                   | ns                    | ns                    | ns                    | ns                                 | ns                                 |
| 120        | ns  | ns                   | ns                    | ns                    | ns                    | ns                                 | ns                                 |
